# Supplementary material
Source: publisher site journal article supplement (https://media.jamanetwork.com/wp-content/uploads/2019/06/06-05-JAMA-abortion-law-supp.pdf)
Supplement: Supplementary file 1 [file 06-05-JAMA-abortion-law-supp.pdf]

## Supplementary Online Content

Reingold RB, Gostin LO. State abortion restrictions and the new Supreme Court: women's access to reproductive health services [published online June 5, 2019]. *JAMA*. doi:10.1001/jama.2019.8437

### **eTable.** State Abortion Laws

This supplementary material has been provided by the authors to give readers additional information about their work.

**eTable. State Abortion Laws<sup>1</sup>**

| Type of Restriction                                            | Specific Restriction                                                     | Laws in Effect or Scheduled to Take Effect                                                                                             | Laws Enjoined by Courts                                                                                            |
|----------------------------------------------------------------|--------------------------------------------------------------------------|----------------------------------------------------------------------------------------------------------------------------------------|--------------------------------------------------------------------------------------------------------------------|
| <i>Abortion Bans in All or Most Cases</i>                      |                                                                          |                                                                                                                                        |                                                                                                                    |
| Outright bans                                                  | Throughout pregnancy                                                     | AL                                                                                                                                     | LA, UT                                                                                                             |
|                                                                | “Trigger” bans                                                           | AR, KY, LA, MS, ND, SD, TN                                                                                                             |                                                                                                                    |
|                                                                | Extent Supreme Court will permit                                         | AR, KS, KY, LA, MO, ND, OH                                                                                                             |                                                                                                                    |
| “Fetal heartbeat” <sup>2</sup> laws                            | 6 weeks                                                                  | GA, LA, OH                                                                                                                             | IA, KY <sup>3</sup> , MS <sup>3</sup> , ND                                                                         |
|                                                                | 8 weeks                                                                  | MO                                                                                                                                     |                                                                                                                    |
| At specific gestational age pre-viability <sup>2</sup>         | 18 weeks                                                                 | AR                                                                                                                                     | UT <sup>3</sup>                                                                                                    |
|                                                                | 20 weeks                                                                 | MS, NC                                                                                                                                 | AZ                                                                                                                 |
|                                                                | 22 weeks                                                                 | AL, AR, GA, IN, IA, KS, KY, LA, NE, ND, OH, OK, SC, SD, TX, WI, WV                                                                     | ID                                                                                                                 |
| Fetal “personhood”                                             | Definition of “person” includes “unborn child”                           | AL, AR, GA, KS, MO, MS, SD, TN, TX                                                                                                     |                                                                                                                    |
|                                                                | Separate criminal offense of feticide (explicitly applied pre-viability) | AL, AK, AR, AZ, FL, GA, ID, IL, IN, KA, KY, LA, MI, MN, MO, MS, NE, NC, ND, OH, OK, PA, SC, SD, TN, TX, UT, WV, WI                     |                                                                                                                    |
| <i>Limitations on Medical Procedures</i>                       |                                                                          |                                                                                                                                        |                                                                                                                    |
| Medication-induced abortions                                   | Prohibition on all medication abortions                                  |                                                                                                                                        | OK                                                                                                                 |
|                                                                | Must be performed by licensed physicians                                 | AL, AK, AR, AZ, DE, FL, GA, ID, IN, IA, KS, KY, LA, ME, MD, MI, MN, MO, MS, NE, NV, NC, ND, OH, OK, PA, SC, SD, TN, TX, UT, VA, WI, WY |                                                                                                                    |
|                                                                | Prohibition on use of telemedicine                                       | AL, AR, AZ, IN, LA, MO, MS, NE, NC, ND, OK, SC, SD, TN, TX, WV, WI                                                                     | IA                                                                                                                 |
| Second or third trimester methods                              | Intact dilation and extraction                                           | AR, AZ, GA, ID, IN, KS, LA, MI, MS, MT, NH, NM, ND, OH, OK, SC, SD, TN, TX, UT, VA                                                     | AL, AK, FL, IL, IA, KY, MO, NE, NJ, RI, WV, WI                                                                     |
|                                                                | Dilation and evacuation                                                  | IN, MO, MS, WV                                                                                                                         | AL, AR <sup>3</sup> , KS <sup>3</sup> , KY <sup>3</sup> , LA <sup>3</sup> , OH <sup>3</sup> , OK <sup>3</sup> , TX |
| <i>Restrictions on Health Professionals &amp; Institutions</i> |                                                                          |                                                                                                                                        |                                                                                                                    |
| Clinics and hospitals                                          | Ambulatory surgical center standards                                     | AL, AR, AZ, IN, KY, LA, MI, MO, MS, NC, OH, OK, PA, RI, SC, SD, UT                                                                     | KS <sup>3</sup> , TN, TX                                                                                           |
|                                                                | Transfer agreement with hospital                                         | FL, MI, NC, OH, PA, WI                                                                                                                 | KY                                                                                                                 |
|                                                                | Burial or cremation of fetal tissue                                      | IN                                                                                                                                     | AR, LA <sup>3</sup> , TX                                                                                           |
| Physicians and other health professionals                      | Hospital admitting privileges                                            | MO, ND, UT                                                                                                                             | AL, KS <sup>3</sup> , LA, MS, OK <sup>3</sup> , TN, TX, WI <sup>3</sup>                                            |

| Type of Restriction                                   | Specific Restriction                                                                                                        | Laws in Effect or Scheduled to Take Effect                                                                                                                                             | Laws Enjoined by Courts      |
|-------------------------------------------------------|-----------------------------------------------------------------------------------------------------------------------------|----------------------------------------------------------------------------------------------------------------------------------------------------------------------------------------|------------------------------|
| Refusals to perform abortions                         | Hospital admitting privileges or alternative agreement (e.g. agreement with another physician who has admitting privileges) | AL, AR, AZ, FL, IN, LA, MS, OK, SC, TX                                                                                                                                                 |                              |
|                                                       | OB/GYN certification or eligibility                                                                                         | AR, MS, SC                                                                                                                                                                             | LA <sup>3</sup>              |
|                                                       | Refusal by health professional                                                                                              | AL, AK, AR, AZ, CA, CT, DE, FL, GA, HI, ID, IL, IN, IA, KS, KY, LA, ME, MD, MA, MI, MN, MO, MS, MT, NE, NV, NJ, NM, NY, NC, ND, OH, OK, OR, PA, RI, SC, SD, TN, TX, UT, VA, WA, WI, WY |                              |
|                                                       | Refusal by all institutions, including public institutions                                                                  | AL, AR, AZ, DE, FL, GA, HI, ID, IL, KS, KY, LA, ME, MD, MI, MO, MS, NE, NM, NY, NC, ND, OH, OK, SD, TN, UT, VA, WA, WI                                                                 |                              |
|                                                       | Refusal by private or religious institutions                                                                                | AK, CA, IN, IA, MA, MN, MT, NV, NJ, OR, PA, SC, TX, WY                                                                                                                                 |                              |
| <b><i>Restrictions on Women's Decision-Making</i></b> |                                                                                                                             |                                                                                                                                                                                        |                              |
| Parental rights                                       | Parental consent                                                                                                            | AL, AR, AZ, ID, IN, KS <sup>4</sup> , KY, LA, MA, MI, MS <sup>4</sup> , NE, NC, ND <sup>4</sup> , OH, PA, RI, SC, TN, WI                                                               | CA, MT <sup>3</sup> , NM     |
|                                                       | Parental notification                                                                                                       | CO, DE, FL, GA, IL, IA, MD, MN <sup>4</sup> , NH, SD, WV                                                                                                                               | AK, MT <sup>3</sup> , NV, NJ |
|                                                       | Parental consent + notification                                                                                             | MO, OK, TX, UT, VA, WY                                                                                                                                                                 |                              |
| Mandatory counseling/ required information            | Description of procedure                                                                                                    | AL, AK, AR, AZ, CT, FL, GA, ID, IN, IA, KS, KY, LA, ME, MI, MN, MO, MS, NE, NV, NC, ND, OH, OK, PA, RI, SC, SD, TX, UT, VA, WV, WI                                                     |                              |
|                                                       | Fetal development                                                                                                           | AL, AK, AR, AZ, CT, FL, GA, ID, IN, KS, KY, LA, ME, MI, MN, MO, MS, NE, NV, NC, ND, OH, OK, PA, RI, SC, SD, TN, TX, UT, VA, WV, WI                                                     |                              |
|                                                       | Health risks of abortion                                                                                                    | AL, AK, AR, AZ, GA, ID, IN, IA, KS, LA, MI, MN, MO, MS, NE, NV, NC, ND, OK, PA, SC, SD, TX, UT, VA, WV, WI                                                                             |                              |
|                                                       | Health risks of pregnancy                                                                                                   | AL, AK, AR, AZ, FL, GA, ID, IN, IA, KS, KY, LA, ME, MI, MN, MS, NE, NC, ND, OH, OK, PA, SC, SD, TN, TX, UT, VA, WV, WI                                                                 |                              |
| Ultrasounds                                           | Health professional must display and describe fetal image                                                                   | LA, TX, WI                                                                                                                                                                             | KY, NC, OK                   |
|                                                       | Health professional must offer option to view fetal image <sup>5</sup>                                                      | AL, AR, AZ, FL, GA, ID, IN, IA, KS, MI, MO, MS, NE, ND, OH, OK, SC, SD, UT, VA, WV, WY                                                                                                 |                              |

| Type of Restriction                       | Specific Restriction                                                                     | Laws in Effect or Scheduled to Take Effect                                                                                                 | Laws Enjoined by Courts                                 |
|-------------------------------------------|------------------------------------------------------------------------------------------|--------------------------------------------------------------------------------------------------------------------------------------------|---------------------------------------------------------|
|                                           | Information on ultrasound services as part of counseling                                 | GA, ID, IN, KS, MI, MO, NE, NC, OK, SC, TX, UT, VA, WI                                                                                     |                                                         |
| Waiting periods                           | 18 hours                                                                                 | IN                                                                                                                                         |                                                         |
|                                           | 24 hours                                                                                 | AZ, GA, ID, KS, KY, LA, MI, MN, MS, NE, ND, OH, PA, SC, TX, VA, WV, WI                                                                     | FL, MA, MT                                              |
|                                           | 48 hours                                                                                 | AL, TN                                                                                                                                     |                                                         |
|                                           | 72 hours                                                                                 | AR, MO, NC, OK, SD, UT                                                                                                                     | LA <sup>3</sup>                                         |
| Reason-specific prohibitions              | Sex or gender selection                                                                  | AR, AZ, KS, MO, NC, ND, OK, PA, SD                                                                                                         | IL, IN, KY <sup>3</sup>                                 |
|                                           | Race selection                                                                           | AZ, MO                                                                                                                                     | IN, KY <sup>3</sup>                                     |
|                                           | Fetus has genetic anomaly                                                                | MO, ND, UT                                                                                                                                 | IN, KY <sup>3</sup> , LA <sup>3</sup> , OH <sup>3</sup> |
| <b>Funding and Reimbursement</b>          |                                                                                          |                                                                                                                                            |                                                         |
| Public funding and insurance restrictions | Prohibitions on use of public funds                                                      | AL, AR, CO, DE, DC, FL, GA, HI, ID, IN, IA, KS, KY, LA, ME, MI, MO, MS, NE, NV, NH, NC, ND, OH, OK, PA, RI, SC, SD, TN, TX, UT, VA, WI, WY |                                                         |
|                                           | Prohibitions on coverage in insurance plans for public employees                         | AZ, CO, GA, ID, IN, KS, KY, MA, MI, MO, MS, NE, NC, ND, OH, OK, PA, RI, SC, TX, UT, VA, WI                                                 |                                                         |
| Private insurance coverage restrictions   | Prohibitions on coverage in all private insurance plans, including through ACA exchanges | ID, IN, KS, KY, MI, MO, NE, ND, OK, TX, UT                                                                                                 | RI                                                      |
|                                           | Prohibitions on coverage in plans offered through exchanges                              | AL, AR, AZ, FL, GA, ID, IN, KS, KY, LA, MI, MO, MS, NE, NC, ND, OH, OK, PA, SC, SD, TN, TX, UT, VA, WI                                     |                                                         |

<sup>1</sup> Sources: The Guttmacher Institute and the National Conference on State Legislatures.

<sup>2</sup> All gestational ages in this table use the medical standard for pregnancy dating, which is based on the patient's last menstrual period (LMP).

<sup>3</sup> Indicates laws that have been temporarily enjoined, rather than permanently enjoined.

<sup>4</sup> Law requires the consent or notification of both parents.

<sup>5</sup> In 9 of these states, health professional must offer option to view fetal image if health professional performs an ultrasound.
